# Supplementary material for: Nanomechanics of antimonene allotropes under tensile loading
Source: Royal Society of Chemistry journal article supplement (doi:10.1039/d0cp05563h), 2021-01-01
Supplement: d0cp05563h5.pdf [file d0cp05563h5.pdf]

## Nanomechanics of Antimonene Allotropes Under Tensile Loading†

Tanmay Sarkar Akash,<sup>a</sup> Rafsan A.S.I. Subad<sup>a,b</sup>, Pritom Bose<sup>a</sup>, and Md Mahbubul Islam<sup>\*c</sup>

<sup>a</sup>Department of Mechanical Engineering, Bangladesh University of Engineering and Technology, Dhaka-1000, Bangladesh

<sup>b</sup>Department of Mechanical Engineering, University of Massachusetts Dartmouth, 285 Old Westport Road, Dartmouth, MA- 02747, USA

<sup>c</sup>Department of Mechanical Engineering, Wayne State University, 5050 Anthony Wayne Drive, Detroit, MI- 48202, USA

\*E-mail: mahbub.islam@wayne.edu

### Supplementary Figures

For the current SW potential parameters, we found a negative out of plane Poisson's ratio at strain larger than 15% (Figure S1).

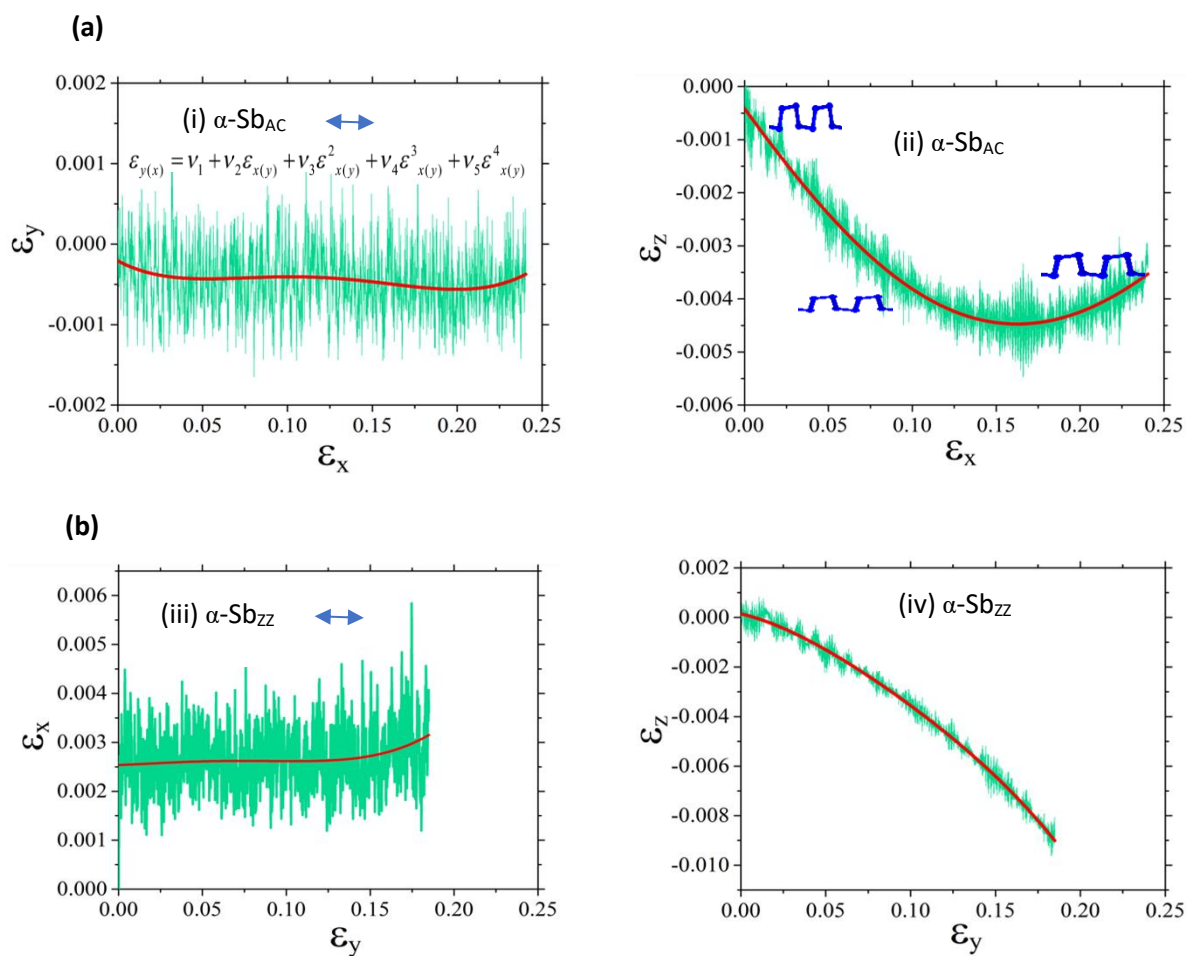

Figure S1: Strain responses of  $\alpha$ -antimonene to the non-loading axes for (a) armchair loading and (b) zigzag loading

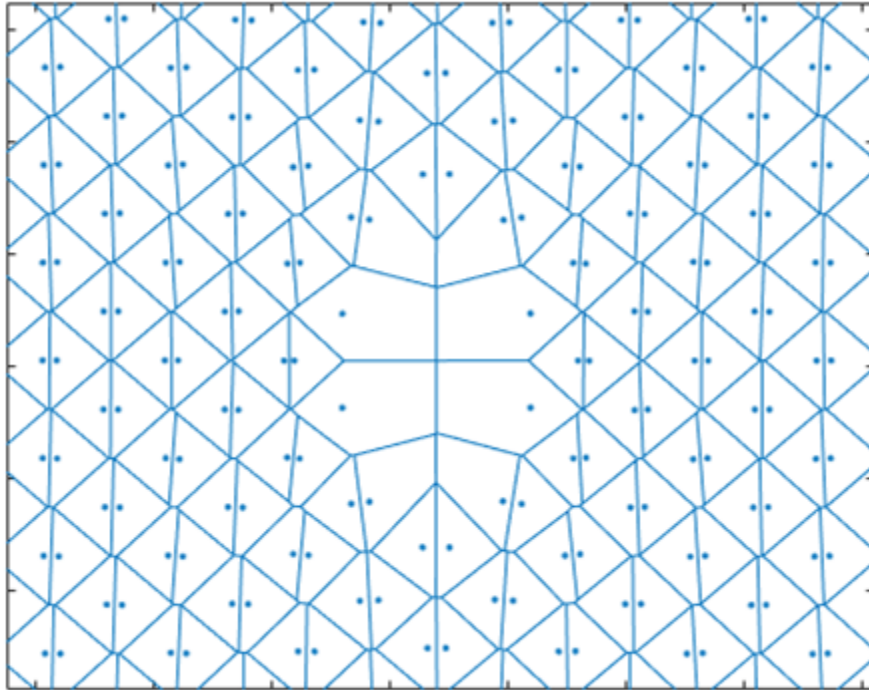

**Figure S2: Voronoi areas for atoms in a cracked  $\alpha$ -antimonene sample. Volumes are calculated with a uniform thickness of 1 nm. Note that, volumes of crack edge atoms (except crack-tips) are ill-defined and not used in our calculations**

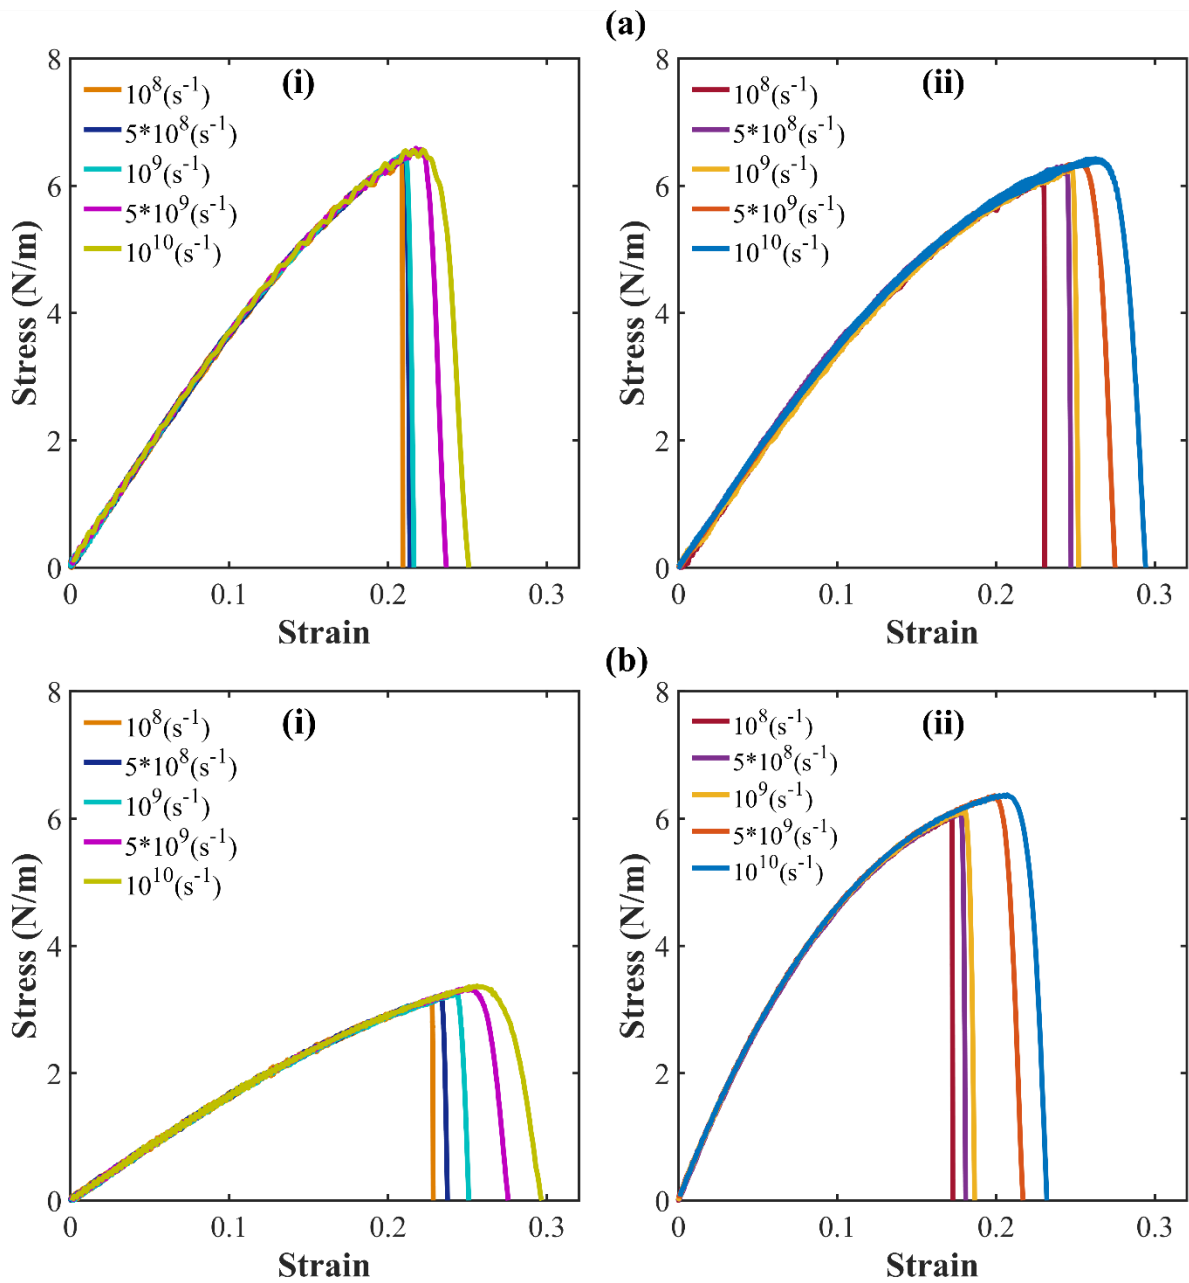

**Figure S3: Strain rate dependent stress-strain relationships for (a)  $\beta$ - and (b)  $\alpha$ - structure of single layer antimonene nano-sheet; (i), and (ii) indicate the loading along armchair and zigzag directions respectively**

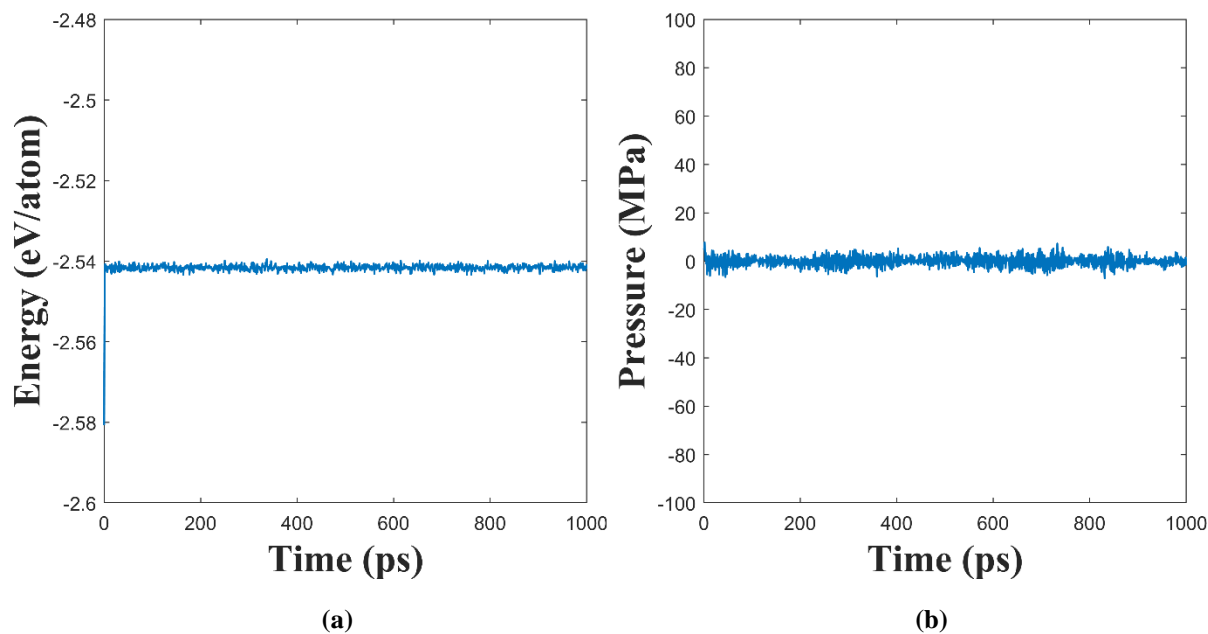

Figure S4: Variation of (a) Energy and (b) Pressure with a trajectory of 1000 picoseconds.

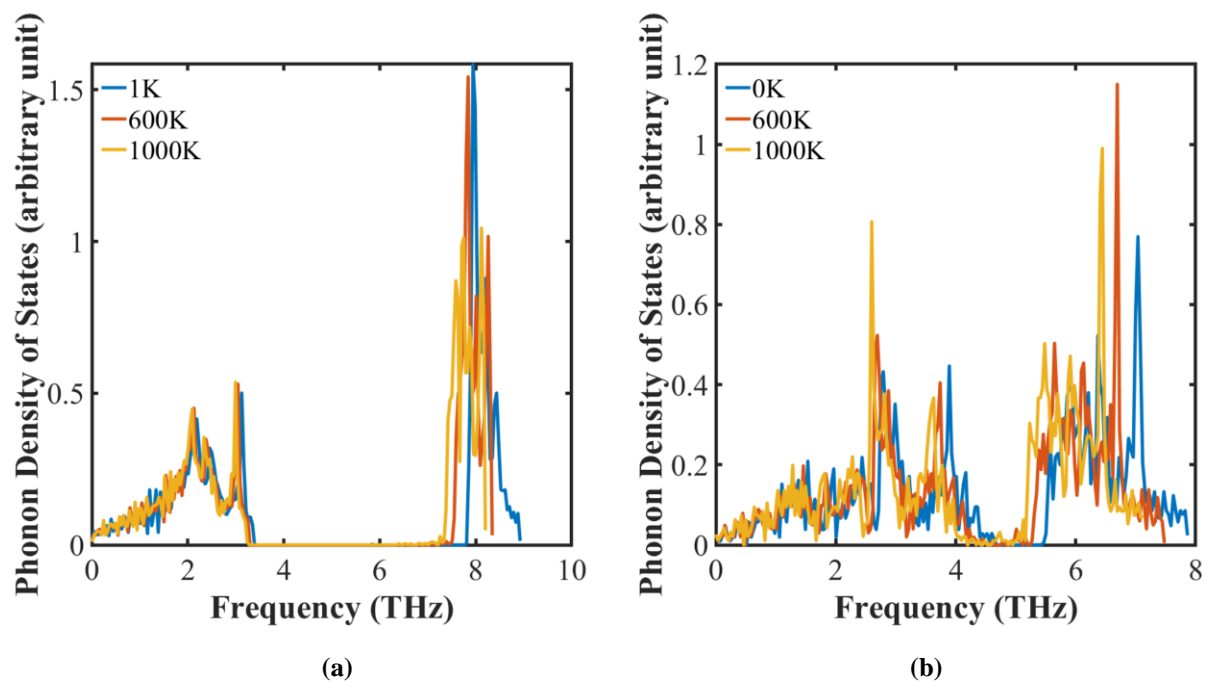

Figure S5: Phonon Density of States of (a)  $\beta$ -, and (b)  $\alpha$  - antimonene at 1K, 600K and 1000K

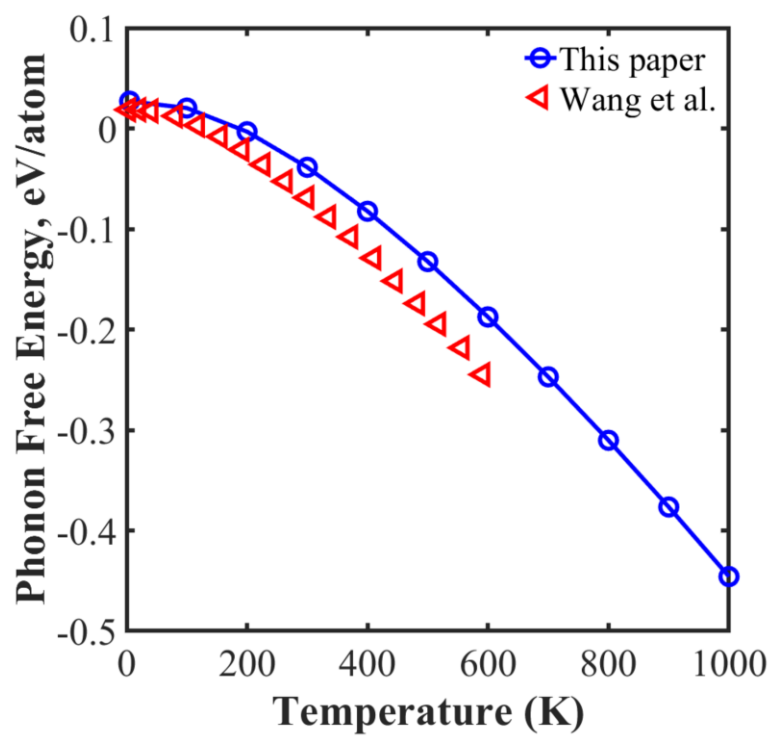

Figure S6: Variation of Phonon Free Energy with temperature

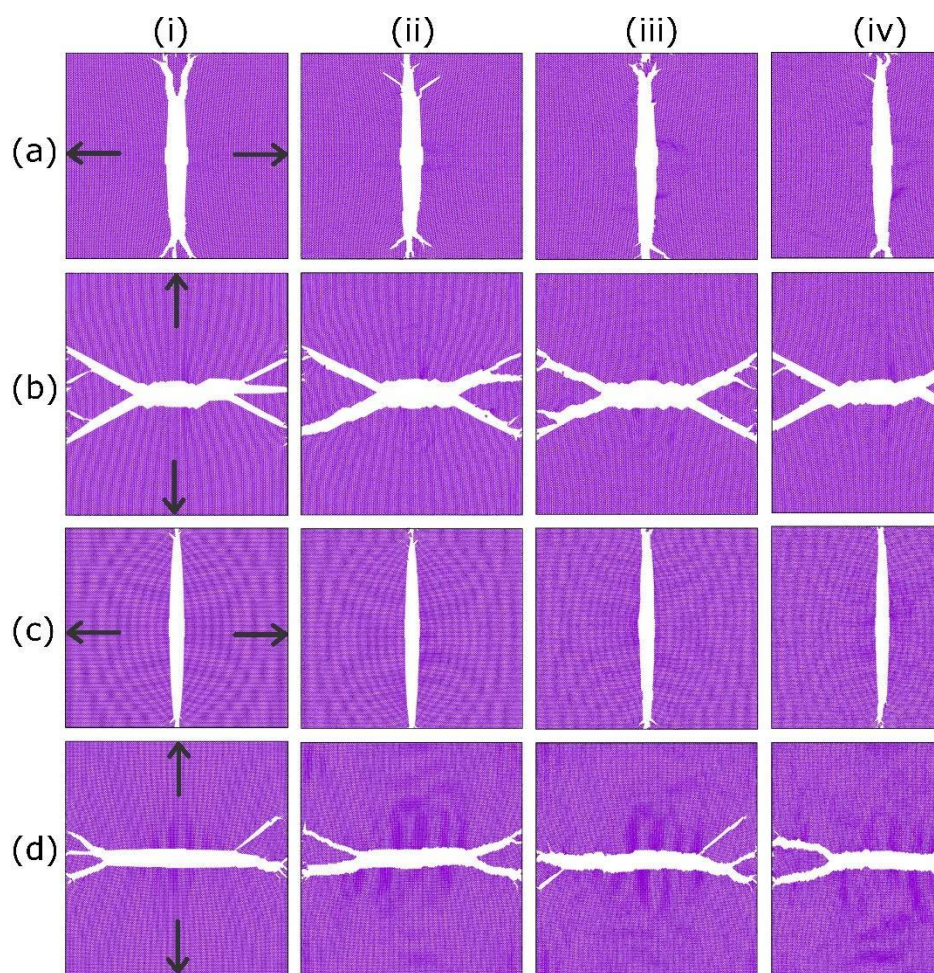

**Figure S7: Snapshots of fracture mechanism of antimonene; buckled structure (a) armchair (b) zigzag loading; puckered structures (c) armchair (d) zigzag loading; for (i) 1K (ii) 300K (iii) 600K (iv) 900K temperatures**

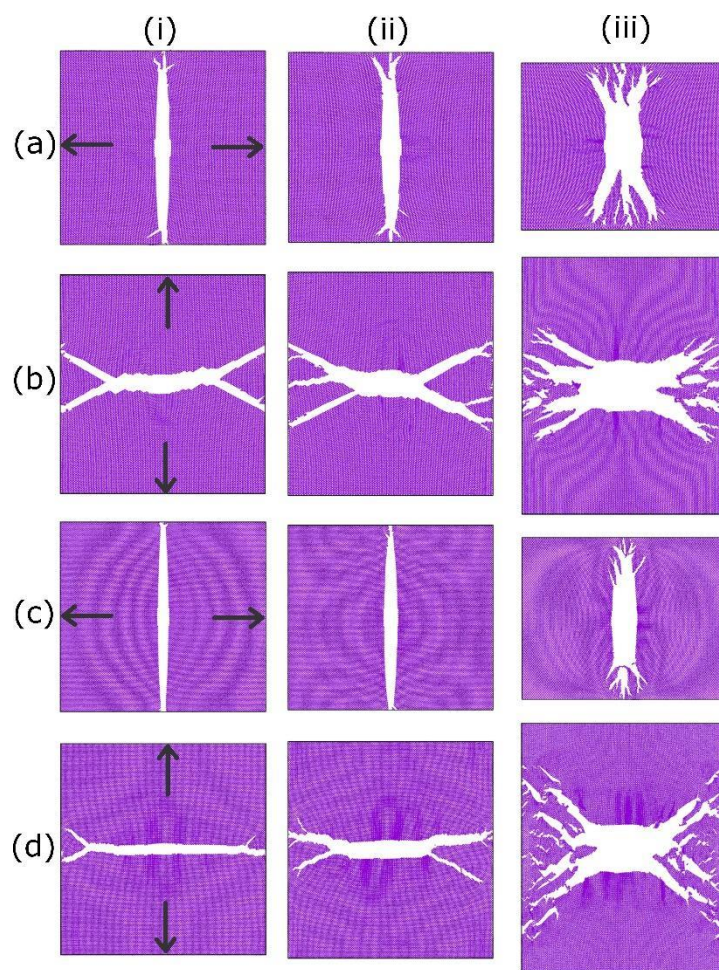

**Figure S8:** Snapshots of fracture mechanism of antimonene; buckled structure (a) armchair (b) zigzag loading; puckered structures (c) armchair (d) zigzag loading; for strain rate (i)  $10^8 \text{ s}^{-1}$  (ii)  $10^9 \text{ s}^{-1}$  (iii)  $10^{10} \text{ s}^{-1}$

**Table S1:** Comparison of fracture properties of different 2D materials.

| Mechanical Properties @300K | Antimonene <sup>This study</sup> |       |                   |       | Arsenene <sup>1</sup> |       |                   |       | Bismuthene <sup>2</sup> |       | Black Phosphorus <sup>3</sup> |      | Graphene <sup>4</sup> |       |
|-----------------------------|----------------------------------|-------|-------------------|-------|-----------------------|-------|-------------------|-------|-------------------------|-------|-------------------------------|------|-----------------------|-------|
|                             | $\alpha$ structure               |       | $\beta$ structure |       | $\alpha$ structure    |       | $\beta$ structure |       | $\beta$ structure       |       | $\alpha$ structure            |      | $\beta$ structure     |       |
|                             | AC                               | ZZ    | AC                | ZZ    | AC                    | ZZ    | AC                | ZZ    | AC                      | ZZ    | AC                            | ZZ   | AC                    | ZZ    |
| Elastic Modulus (N/m)       | 17.09                            | 62.50 | 37.65             | 33.58 | ~20                   | ~70   | ~50               | ~50   | ~26.10                  | ~25.5 | 18.9                          | 88.9 | 355.1                 | 366.2 |
| UTS (N/m)                   | 3.18                             | 6.17  | 6.51              | 6.31  | ~3.00                 | ~5.00 | ~7.00             | ~6.80 | ~4.1                    | ~4.2  | 1.9                           | 4.00 | 21.84                 | 31.55 |
| Fracture Strain             | 0.25                             | 0.19  | 0.22              | 0.25  | 0.18                  | ~0.1  | 0.17              | 0.19  | ~20.0                   | ~23.0 | 0.1                           | .054 | 0.09                  | 0.13  |

# Matlab script for replicating unit cell

```
clear all

close all

clc

C=[];

%Define length for one repeatation :
% -----

ux = input('x-length of unit cell periodicity');
uy = input('y-length of unit cell periodicity');

% Define coordinate of for one repeatation:
% -----

X = importdata('unitcell.txt'); %% format: type x y z_coordinate
type = X(:,1)
u = X(:,2:end)

% =====

% Define antimonene atom position of the Graphene :
% -----

n = round(input('Angstrom length in X direction = ')/ux);
m = round(input('Angstrom length in Y direction = ')/uy);
s_z = 0 %z_coordinate
num = 0.0;
for j = 1:m;
    for i = 1:n;
        for c = 1:4;
            num = num+1;
            C(num,1) = type;
            C(num,2) = u(c,1)+(i-1)*ux;
            C(num,3) = u(c,2)+(j-1)*uy;
            C(num,4) = s_z;
        end
    end
end

n_atom = length(C);
atom_dat = [(1:n_atom)' C]
```



# $\beta$ -Antimonene Unit Cell

# LAMMPS structure data file

# ntot = 16

16 atoms

1 atom types

0.00000000 14.27209851 xlo xhi

0.00000000 8.23999992 ylo yhi

0.00000000 105.63000011 zlo zhi

Atoms

|    |   |             |            |             |
|----|---|-------------|------------|-------------|
| 1  | 1 | 0.10000000  | 0.10000000 | 52.91500006 |
| 2  | 1 | 1.28934154  | 2.15999994 | 54.55633104 |
| 3  | 1 | 3.66802463  | 2.15999994 | 52.91500006 |
| 4  | 1 | 4.85736617  | 0.10000000 | 54.55633104 |
| 5  | 1 | 0.10000000  | 4.21999996 | 52.91500006 |
| 6  | 1 | 1.28934154  | 6.27999990 | 54.55633104 |
| 7  | 1 | 3.66802463  | 6.27999990 | 52.91500006 |
| 8  | 1 | 4.85736617  | 4.21999996 | 54.55633104 |
| 9  | 1 | 7.23604926  | 0.10000000 | 52.91500006 |
| 10 | 1 | 8.42539080  | 2.15999994 | 54.55633104 |
| 11 | 1 | 10.80407389 | 2.15999994 | 52.91500006 |
| 12 | 1 | 11.99341543 | 0.10000000 | 54.55633104 |
| 13 | 1 | 7.23604926  | 4.21999996 | 52.91500006 |
| 14 | 1 | 8.42539080  | 6.27999990 | 54.55633104 |
| 15 | 1 | 10.80407389 | 6.27999990 | 52.91500006 |
| 16 | 1 | 11.99341543 | 4.21999996 | 54.55633104 |

# $\alpha$ -Antimonene Unit Cell

# LAMMPS structure data file

# ntot = 32

32 atoms

8 atom types

0.00000000 18.92000000 xlo xhi

0.00000000 8.72000000 ylo yhi

0.00000000 105.55500000 zlo zhi

Atoms

|    |   |             |            |             |
|----|---|-------------|------------|-------------|
| 1  | 1 | 0.29188000  | 2.68000000 | 51.85542000 |
| 2  | 2 | 0.70812000  | 2.68000000 | 54.69958000 |
| 3  | 3 | 2.65688000  | 4.86000000 | 55.07458000 |
| 4  | 4 | 3.07312000  | 4.86000000 | 52.23042000 |
| 5  | 5 | 5.02188000  | 2.68000000 | 51.85542000 |
| 6  | 6 | 5.43812000  | 2.68000000 | 54.69958000 |
| 7  | 7 | 7.38688000  | 4.86000000 | 55.07458000 |
| 8  | 8 | 7.80312000  | 4.86000000 | 52.23042000 |
| 9  | 1 | 0.29188000  | 7.04000000 | 51.85542000 |
| 10 | 2 | 0.70812000  | 7.04000000 | 54.69958000 |
| 11 | 3 | 2.65688000  | 9.22000000 | 55.07458000 |
| 12 | 4 | 3.07312000  | 9.22000000 | 52.23042000 |
| 13 | 5 | 5.02188000  | 7.04000000 | 51.85542000 |
| 14 | 6 | 5.43812000  | 7.04000000 | 54.69958000 |
| 15 | 7 | 7.38688000  | 9.22000000 | 55.07458000 |
| 16 | 8 | 7.80312000  | 9.22000000 | 52.23042000 |
| 17 | 1 | 9.75188000  | 2.68000000 | 51.85542000 |
| 18 | 2 | 10.16812000 | 2.68000000 | 54.69958000 |

|    |   |             |            |             |
|----|---|-------------|------------|-------------|
| 19 | 3 | 12.11688000 | 4.86000000 | 55.07458000 |
| 20 | 4 | 12.53312000 | 4.86000000 | 52.23042000 |
| 21 | 5 | 14.48188000 | 2.68000000 | 51.85542000 |
| 22 | 6 | 14.89812000 | 2.68000000 | 54.69958000 |
| 23 | 7 | 16.84688000 | 4.86000000 | 55.07458000 |
| 24 | 8 | 17.26312000 | 4.86000000 | 52.23042000 |
| 25 | 1 | 9.75188000  | 7.04000000 | 51.85542000 |
| 26 | 2 | 10.16812000 | 7.04000000 | 54.69958000 |
| 27 | 3 | 12.11688000 | 9.22000000 | 55.07458000 |
| 28 | 4 | 12.53312000 | 9.22000000 | 52.23042000 |
| 29 | 5 | 14.48188000 | 7.04000000 | 51.85542000 |
| 30 | 6 | 14.89812000 | 7.04000000 | 54.69958000 |
| 31 | 7 | 16.84688000 | 9.22000000 | 55.07458000 |
| 32 | 8 | 17.26312000 | 9.22000000 | 52.23042000 |

## References

- 1 B. Yang, M. Li, J. Wang, J. Zhang, D. Liao and Y. Yue, *Phys. Chem. Chem. Phys.*, 2019, **21**, 12372–12379.
- 2 E. H. Chowdhury, M. H. Rahman, P. Bose, R. Jayan and M. M. Islam, *Phys. Chem. Chem. Phys.*, 2020, **22**, 28238–28255.
- 3 Z. Yang, J. Zhao and N. Wei, *Appl. Phys. Lett.*, 2015, **107**, 023107.
- 4 A. A. Anastasi, K. Ritos, G. Cassar and M. K. Borg, *Mol. Simul.*, 2016, **42**, 1502–1511.
